# Supplementary material for: Racial differences in long-term social, physical, and psychological health among adolescent and young adult cancer survivors
Source: Springer Nature journal article supplement (doi:10.1186/s12916-023-03005-3), 2023-08-04
Supplement: MOESM1 [file 25888242]

**Supplement Table S1. Prevalence of social, physical, and psychological health characteristics in AYA survivors by race/ethnicity**

| <b>Characteristics</b>             | <b>NHW<br/>weighted<br/>proportion* (SE)</b> | <b>AA<br/>weighted<br/>proportion* (SE)</b> | <b>Hispanic<br/>weighted<br/>proportion* (SE)</b> | <b>Asian<br/>weighted<br/>proportion*(SE)</b> | <b>P value</b>   | <b>a§</b> |
|------------------------------------|----------------------------------------------|---------------------------------------------|---------------------------------------------------|-----------------------------------------------|------------------|-----------|
| <b>General health</b>              |                                              |                                             |                                                   |                                               | <b>0.03</b>      | 0.04      |
| Poor                               | 2.9 (0.03)                                   | 10.7 (0.01)                                 | 8.0 (0.04)                                        | 7.6 (0.01)                                    |                  |           |
| Fair                               | 16.0 (0.06)                                  | 20.5 (0.01)                                 | 28.9 (0.07)                                       | 22.1 (0.01)                                   |                  |           |
| Good                               | 45.4 (0.08)                                  | 43.7 (0.02)                                 | 38.2 (0.08)                                       | 45.4 (0.02)                                   |                  |           |
| Very good                          | 26.3 (0.07)                                  | 21.1 (0.01)                                 | 18.8 (0.06)                                       | 21.4 (0.01)                                   |                  |           |
| Excellent                          | 9.4 (0.05)                                   | 4.0 (0.01)                                  | 6.1 (0.04)                                        | 3.5 (0.01)                                    |                  |           |
| <b>Social health</b>               |                                              |                                             |                                                   |                                               |                  |           |
| <b>Education</b>                   |                                              |                                             |                                                   |                                               | <b>&lt; 0.01</b> | <0.01     |
| Less than high school graduate     | 10.6 (0.01)                                  | 11.8 (0.01)                                 | 32.1 (0.02)                                       | 15.7 (0.01)                                   |                  |           |
| High school graduate               | 16.6 (0.01)                                  | 15.7 (0.01)                                 | 25.2 (0.02)                                       | 40.0 (0.02)                                   |                  |           |
| More than university               | 72.8 (0.02)                                  | 72.5 (0.02)                                 | 42.7 (0.02)                                       | 44.3 (0.02)                                   |                  |           |
| <b>Current job status</b>          |                                              |                                             |                                                   |                                               | <b>&lt; 0.01</b> | <0.01     |
| Unemployed                         | 41.1 (0.10)                                  | 46.4 (0.02)                                 | 28.8 (0.09)                                       | 42.5 (0.02)                                   |                  |           |
| Employee                           | 54.3 (0.10)                                  | 53.6 (0.02)                                 | 58.4 (0.10)                                       | 46.7 (0.02)                                   |                  |           |
| Self-employed                      | 4.6 (0.04)                                   | 0.0 (0.00)                                  | 12.8 (0.07)                                       | 10.8 (0.01)                                   |                  |           |
| <b>Employment hours, mean (SE)</b> | 42.94 (1.21)                                 | 33.39 (2.97)                                | 34.66 (1.48)                                      | 38.10 (1.39)                                  | <b>&lt; 0.01</b> | <0.01     |
| <b>Marital status</b>              |                                              |                                             |                                                   |                                               | <b>&lt; 0.01</b> | <0.01     |
| Single                             | 8.7 (0.01)                                   | 28.0 (0.02)                                 | 7.5 (0.01)                                        | 11.0 (0.01)                                   |                  |           |
| Divorced or separated              | 16.6 (0.01)                                  | 22.0 (0.01)                                 | 27.6 (0.02)                                       | 7.3 (0.01)                                    |                  |           |
| Widowed                            | 5.5 (0.01)                                   | 13.5 (0.01)                                 | 2.8 (0.01)                                        | 4.3 (0.01)                                    |                  |           |
| Married or living with partner     | 69.2 (0.02)                                  | 36.5 (0.02)                                 | 62.1 (0.02)                                       | 77.4 (0.01)                                   |                  |           |
| <b>Yearly household income</b>     |                                              |                                             |                                                   |                                               | <b>&lt; 0.01</b> | <0.01     |
| Less than \$20,000                 | 11.9 (0.01)                                  | 26.6 (0.02)                                 | 29.6 (0.02)                                       | 14.3 (0.01)                                   |                  |           |
| \$20,000 to \$54,999               | 28.3 (0.02)                                  | 34.7 (0.02)                                 | 39.8 (0.02)                                       | 47.3 (0.02)                                   |                  |           |

|                                            |              |              |              |              |                  |       |
|--------------------------------------------|--------------|--------------|--------------|--------------|------------------|-------|
| \$55,000 to \$74,999                       | 16.7 (0.01)  | 17.4 (0.01)  | 10.8 (0.01)  | 19.0 (0.01)  |                  |       |
| More than \$75,000                         | 43.1 (0.02)  | 21.3 (0.01)  | 19.8 (0.01)  | 19.3 (0.01)  |                  |       |
| <b>Household type</b>                      |              |              |              |              | <b>0.01</b>      | 0.01  |
| Single (living alone)                      | 13.5 (0.01)  | 11.3 (0.01)  | 4.6 (0.01)   | 6.2 (0.01)   |                  |       |
| <b>Physical health</b>                     |              |              |              |              |                  |       |
| <b>Smoking status</b>                      |              |              |              |              | <b>&lt; 0.01</b> | 0.01  |
| Never                                      | 46.6 (0.02)  | 52.5 (0.02)  | 76.2 (0.01)  | 76.5 (0.01)  |                  |       |
| Former                                     | 26.6 (0.02)  | 28.2 (0.02)  | 12.0 (0.01)  | 11.7 (0.01)  |                  |       |
| Current                                    | 26.8 (0.02)  | 19.3 (0.01)  | 11.8 (0.01)  | 11.8 (0.01)  |                  |       |
| <b>Alcohol status</b>                      |              |              |              |              | <b>&lt; 0.01</b> | 0.02  |
| Never                                      | 5.5 (0.02)   | 5.0 (0.01)   | 21.6 (0.02)  | 10.8 (0.01)  |                  |       |
| Former                                     | 13.0 (0.02)  | 26.3 (0.01)  | 22.6 (0.02)  | 15.1 (0.01)  |                  |       |
| Current                                    | 81.6 (0.02)  | 68.7 (0.02)  | 55.8 (0.02)  | 74.1 (0.02)  |                  |       |
| <b>BMI (kg/m<sup>2</sup>), mean (SE)</b>   | 29.17 (0.56) | 30.85 (0.89) | 30.56 (0.64) | 23.39 (0.21) | <b>&lt; 0.01</b> | 0.02  |
| <b>Waist circumference (cm), mean (SE)</b> | 99.71 (1.23) | 98.68 (2.07) | 98.89 (1.53) | 79.03 (0.60) | <b>&lt; 0.01</b> | 0.02  |
| <b>Reproductive health<sup>†</sup></b>     |              |              |              |              |                  |       |
| Ever pregnant, <i>yes</i>                  | 85.6 (0.01)  | 94.4 (0.01)  | 91.1 (0.01)  | 89.6 (0.01)  | 0.230            | 0.048 |
| Ever birth, <i>yes</i>                     | 84.0 (0.01)  | 91.6 (0.01)  | 90.4 (0.01)  | 88.7 (0.01)  | 0.760            | 0.050 |
| <b>Comorbidities, <i>yes</i></b>           |              |              |              |              |                  |       |
| <b>Cardiovascular</b>                      |              |              |              |              |                  |       |
| Hypertension                               | 32.7 (0.02)  | 45.9 (0.02)  | 17.8 (0.01)  | 16.4 (0.01)  | <b>&lt; 0.01</b> | 0.02  |
| Stroke                                     | 3.3 (0.01)   | 13.1 (0.01)  | 2.7 (0.01)   | 0.5 (0.01)   | <b>0.02</b>      | 0.039 |
| Angina/angina pectoris                     | 3.6 (0.01)   | 3.9 (0.01)   | 0.4 (0.01)   | 1.2 (0.01)   | 0.08             | 0.046 |
| Myocardial infraction                      | 3.8 (0.01)   | 4.8 (0.01)   | 2.1 (0.01)   | 0.4 (0.01)   | <b>0.01</b>      | 0.03  |
| Obesity                                    | 35.9 (0.02)  | 50.0 (0.02)  | 49.6 (0.02)  | 31.3 (0.02)  | <b>0.01</b>      | 0.04  |
| Dyslipidemia                               | 27.8 (0.01)  | 21.0 (0.01)  | 9.7 (0.01)   | 8.1 (0.01)   | <b>&lt; 0.01</b> | 0.02  |
| DM                                         | 8.3 (0.01)   | 12.3 (0.01)  | 14.0 (0.01)  | 6.6 (0.01)   | <b>&lt; 0.01</b> | 0.02  |

|                                                                |             |             |             |             |               |      |
|----------------------------------------------------------------|-------------|-------------|-------------|-------------|---------------|------|
| <b>Non-cardiovascular</b>                                      |             |             |             |             |               |      |
| Arthritis                                                      | 39.6 (0.02) | 43.7 (0.02) | 23.4 (0.01) | 8.4 (0.01)  | < <b>0.01</b> | 0.02 |
| Thyroid disease                                                | 18.6 (0.01) | 16.5 (0.01) | 20.9 (0.01) | 10.7 (0.01) | 0.05          | 0.04 |
| Asthma                                                         | 23.5 (0.01) | 15.2 (0.01) | 25.7 (0.02) | 3.3 (0.01)  | < <b>0.01</b> | 0.02 |
| <b>Psychological health</b>                                    |             |             |             |             |               |      |
| Daily activity limitation due to emotional problem, <i>yes</i> | 5.0 (0.01)  | 2.8 (0.02)  | 5.1 (0.02)  | 3.8 (0.02)  | < <b>0.01</b> | 0.03 |
| Depression, <i>PHQ-9</i> $\geq 10$ <sup>††</sup>               | 3.0 (0.01)  | 2.8 (0.01)  | 1.2 (0.01)  | 9.2 (0.01)  | <b>0.02</b>   | 0.04 |
| Suicide ideation, <i>yes</i>                                   | 4.7 (0.01)  | 3.0 (0.01)  | 5.4 (0.01)  | 10.7 (0.01) | < <b>0.01</b> | 0.03 |

AA, African American; DM, Diabetes mellitus; NHW, non-Hispanic White.

\*Weighted analysis of variance (ANOVA) and  $\chi^2$  tests for weighted proportion and standard error

<sup>†</sup> Female only

<sup>††</sup> Only include available PHQ-9 data in NHANES from 2007-2018 and K-NHANES from 2014-2018.

§Those fields provide the corrected significance level after Benjamini and Hochberg (1995). All p-values below the provided value of “a” show significant results, given the setup you have chosen for multiple testing.
