# Supplementary material for: Racial differences in long-term social, physical, and psychological health among adolescent and young adult cancer survivors
Source: Springer Nature journal article supplement (doi:10.1186/s12916-023-03005-3), 2023-08-04
Supplement: MOESM2 [file 25888242]

**Supplement Table S2. Prevalence of social, physical, and psychological health characteristics among matched general by race/ethnicity**

| <b>Characteristics</b>             | <b>NHW<br/>weighted<br/>proportion (SE)</b> | <b>AA<br/>weighted<br/>proportion (SE)</b> | <b>Hispanic<br/>weighted<br/>proportion (SE)</b> | <b>Asian<br/>weighted<br/>proportion (SE)</b> | <b>P value</b>   |
|------------------------------------|---------------------------------------------|--------------------------------------------|--------------------------------------------------|-----------------------------------------------|------------------|
| <b>General health</b>              |                                             |                                            |                                                  |                                               | <b>&lt;0.001</b> |
| Poor                               | 11.7 (0.02)                                 | 9.4 (0.01)                                 | 6.4 (0.02)                                       | 4.5 (0.00)                                    |                  |
| Fair                               | 39.0 (0.01)                                 | 19.0 (0.03)                                | 18.5 (0.01)                                      | 31.0 (0.03)                                   |                  |
| Good                               | 36.5 (0.03)                                 | 46.7 (0.01)                                | 42.2 (0.03)                                      | 50.1 (0.01)                                   |                  |
| Very good                          | 10.9 (0.01)                                 | 19.9 (0.03)                                | 29.1 (0.01)                                      | 12.5 (0.02)                                   |                  |
| Excellent                          | 2.0 (0.01)                                  | 5.0 (0.00)                                 | 3.7 (0.01)                                       | 1.9 (0.00)                                    |                  |
| <b>Social health</b>               |                                             |                                            |                                                  |                                               |                  |
| <b>Education</b>                   |                                             |                                            |                                                  |                                               | <b>&lt;0.001</b> |
| Less than high school graduate     | 9.7 (0.01)                                  | 15.8 (0.01)                                | 44.4 (0.01)                                      | 16.8 (0.01)                                   |                  |
| High school graduate               | 22.9 (0.01)                                 | 25.9 (0.01)                                | 18.7 (0.01)                                      | 35.3 (0.01)                                   |                  |
| More than university               | 67.4 (0.01)                                 | 58.3 (0.01)                                | 36.9 (0.01)                                      | 47.9 (0.01)                                   |                  |
| <b>Current job status</b>          |                                             |                                            |                                                  |                                               | <b>&lt;0.001</b> |
| Unemployed                         | 35.6 (0.06)                                 | 39.4 (0.01)                                | 38.6 (0.06)                                      | 38.6 (0.01)                                   |                  |
| Employee                           | 57.7 (0.01)                                 | 57.1 (0.06)                                | 56.8 (0.01)                                      | 47.0 (0.01)                                   |                  |
| Self-employed                      | 6.7 (0.03)                                  | 3.5 (0.00)                                 | 4.6 (0.03)                                       | 14.5 (0.01)                                   |                  |
| <b>Employment hours, mean (SE)</b> | 38.52 (14.26)                               | 37.70 (14.04)                              | 39.47 (14.23)                                    | 39.94 (17.09)                                 | 0.17             |
| <b>Marital status</b>              |                                             |                                            |                                                  |                                               | <b>&lt;0.001</b> |
| Single                             | 11.2 (0.01)                                 | 28.0 (0.01)                                | 13.6 (0.01)                                      | 15.8 (0.01)                                   |                  |
| Divorced or separated              | 12.8 (0.01)                                 | 20.4 (0.01)                                | 16.8 (0.01)                                      | 4.5 (0.00)                                    |                  |
| Widowed                            | 4.8 (0.00)                                  | 8.8 (0.01)                                 | 1.3 (0.02)                                       | 4.2 (0.00)                                    |                  |
| Married or living with partner     | 71.2 (0.01)                                 | 42.8 (0.01)                                | 68.2 (0.01)                                      | 75.5 (0.01)                                   |                  |
| <b>Yearly household income</b>     |                                             |                                            |                                                  |                                               | <b>&lt;0.001</b> |

|                                        |               |                |               |              |                  |
|----------------------------------------|---------------|----------------|---------------|--------------|------------------|
| Less than \$20,000                     | 10.3 (0.01)   | 26.1 (0.01)    | 25.0 (0.01)   | 14.8 (0.01)  |                  |
| \$20,000 to \$54,999                   | 30.1 (0.01)   | 43.0 (0.01)    | 47.1 (0.01)   | 47.6 (0.01)  |                  |
| \$55,000 to \$74,999                   | 11.8 (0.01)   | 11.0 (0.01)    | 9.5 (0.01)    | 15.6 (0.01)  |                  |
| More than \$75,000                     | 47.8 (0.01)   | 19.8 (0.01)    | 18.3 (0.01)   | 22.0 (0.01)  |                  |
| <b>Household type</b>                  |               |                |               |              | <b>&lt;0.001</b> |
| Single (living alone)                  | 12.4 (0.01)   | 12.6 (0.01)    | 2.8 (0.00)    | 6.0 (0.00)   |                  |
| <b>Physical health</b>                 |               |                |               |              |                  |
| <b>Smoking status</b>                  |               |                |               |              | <b>&lt;0.001</b> |
| Never                                  | 56.9 (0.29)   | 64.0 (0.01)    | 76.8 (0.24)   | 71.5 (0.01)  |                  |
| Former                                 | 43.1 (0.01)   | 36.0 (0.28)    | 23.2 (0.01)   | 10.2 (0.17)  |                  |
| Current                                | 0.0 (0.00)    | 0.0 (0.00)     | 0.0 (0.00)    | 18.2 (0.01)  |                  |
| <b>Alcohol status</b>                  |               |                |               |              | <b>&lt;0.001</b> |
| Never                                  | 8.5 (0.02)    | 19.7 (0.01)    | 22.1 (0.03)   | 9.4 (0.01)   |                  |
| Former                                 | 11.7 (0.01)   | 17.8 (0.02)    | 18.6 (0.01)   | 13.8 (0.02)  |                  |
| Current                                | 79.7 (0.03)   | 62.5 (0.01)    | 59.3 (0.03)   | 76.8 (0.01)  |                  |
| <b>BMI (kg/m<sup>2</sup>), mean</b>    | 29.34 (7.33)  | 32.67 (8.76)   | 30.17 (6.42)  | 23.31 (3.45) | <b>&lt;0.001</b> |
| <b>Waist circumference (cm), mean</b>  | 99.66 (17.03) | 102.56 (16.97) | 98.55 (15.21) | 78.38 (9.87) | <b>&lt;0.001</b> |
| <b>Reproductive health<sup>†</sup></b> |               |                |               |              |                  |
| Ever pregnant, <i>yes</i>              | 84.2 (0.01)   | 92.4 (0.01)    | 90.1 (0.01)   | 84.5 (0.01)  | 0.07             |
| Ever birth, <i>yes</i>                 | 82.9 (0.01)   | 91.8 (0.01)    | 89.6 (0.01)   | 81.6 (0.01)  | <b>0.02</b>      |
| <b>Comorbidities, <i>yes</i></b>       |               |                |               |              |                  |
| <b>Cardiovascular</b>                  |               |                |               |              |                  |
| Hypertension                           | 28.1 (0.01)   | 37.0 (0.01)    | 16.5 (0.01)   | 17.8 (0.01)  | <b>&lt;0.001</b> |
| Stroke                                 | 2.5 (0.00)    | 4.1 (0.00)     | 1.2 (0.00)    | 0.5 (0.00)   | <b>&lt;0.001</b> |
| Angina/angina pectoris                 | 2.1 (0.00)    | 2.2 (0.00)     | 1.4 (0.00)    | 0.4 (0.00)   | <b>&lt;0.001</b> |
| Myocardial infarction                  | 2.2 (0.00)    | 2.2 (0.00)     | 1.8 (0.00)    | 0.2 (0.00)   | <b>&lt;0.001</b> |

|                                                                |             |             |             |             |                |
|----------------------------------------------------------------|-------------|-------------|-------------|-------------|----------------|
| Obesity                                                        | 36.0 (0.01) | 59.2 (0.01) | 44.8 (0.01) | 28.6 (0.01) | < <b>0.001</b> |
| Dyslipidemia                                                   | 19.1 (0.01) | 16.2 (0.01) | 7.9 (0.01)  | 4.8 (0.00)  | < <b>0.001</b> |
| DM                                                             | 7.1 (0.01)  | 11.3 (0.01) | 8.9 (0.01)  | 5.7 (0.00)  | <b>0.03</b>    |
| <b>Non-cardiovascular</b>                                      |             |             |             |             |                |
| Arthritis                                                      | 27.7 (0.01) | 25.3 (0.01) | 14.4 (0.01) | 7.6 (0.01)  | < <b>0.001</b> |
| Thyroid disease                                                | 13.2 (0.01) | 9.1 (0.01)  | 9.1 (0.01)  | 4.5 (0.00)  | < <b>0.001</b> |
| Asthma                                                         | 16.7 (0.01) | 20.1 (0.01) | 10.1 (0.01) | 2.9 (0.00)  | < <b>0.001</b> |
| <b>Psychological health</b>                                    |             |             |             |             |                |
| Daily activity limitation due to emotional problem, <i>yes</i> | 0.2 (0.00)  | 0.0 (0.00)  | 0.0 (0.00)  | 0.5 (0.00)  | 0.63           |
| Depression, <i>PHQ-9</i> $\geq 10$ <sup>††</sup>               | 1.2 (0.00)  | 2.5 (0.00)  | 1.8 (0.00)  | 3.6 (0.00)  | <b>0.001</b>   |
| Suicide ideation, <i>yes</i>                                   | 2.9 (0.00)  | 3.4 (0.00)  | 3.7 (0.00)  | 8.4 (0.00)  | < <b>0.001</b> |

AA, African American; DM, Diabetes mellitus; NHW, non-Hispanic White.

<sup>†</sup> Female only

<sup>††</sup> Only include available PHQ-9 data in NHANES from 2007-2018 and K-NHANES from 2014-2018.
