# Supplementary material for: Racial differences in long-term social, physical, and psychological health among adolescent and young adult cancer survivors
Source: Springer Nature journal article supplement (doi:10.1186/s12916-023-03005-3), 2023-08-04
Supplement: MOESM3 [file 25888242]

|                                                                                                                 | NHW                                                                                    | AA                                                                                       | Hispanic                                                                                 | Asian                                                                                    |
|-----------------------------------------------------------------------------------------------------------------|----------------------------------------------------------------------------------------|------------------------------------------------------------------------------------------|------------------------------------------------------------------------------------------|------------------------------------------------------------------------------------------|
| Poor general health (%)                                                                                         |  18.9 |  12.9 |  24.9 |  32.8 |
| <b>Social health</b>                                                                                            |                                                                                        |                                                                                          |                                                                                          |                                                                                          |
| Low education                  | 10.6                                                                                   | 11.8                                                                                     | 32.1                                                                                     | 15.7                                                                                     |
| Non-couple                     | 30.8                                                                                   | 63.5                                                                                     | 37.9                                                                                     | 22.6                                                                                     |
| Low household income           | 11.9                                                                                   | 26.6                                                                                     | 29.6                                                                                     | 14.3                                                                                     |
| Unemployed                     | 41.1                                                                                   | 46.4                                                                                     | 28.8                                                                                     | 42.5                                                                                     |
| <b>Physical health</b>                                                                                          |                                                                                        |                                                                                          |                                                                                          |                                                                                          |
| Former/current smoker          | 53.4                                                                                   | 47.5                                                                                     | 23.8                                                                                     | 23.5                                                                                     |
| Former/current drinker         | 94.6                                                                                   | 95.0                                                                                     | 78.4                                                                                     | 89.2                                                                                     |
| CVD comorbidities**            | 36.2                                                                                   | 51.9                                                                                     | 19.2                                                                                     | 17.5                                                                                     |
| Non-CVD comorbidities**        | 72.6                                                                                   | 78.6                                                                                     | 68.2                                                                                     | 49.4                                                                                     |
| Pregnant, yes                 | 85.6                                                                                   | 94.4                                                                                     | 91.1                                                                                     | 89.6                                                                                     |
| Birth, yes                   | 84.0                                                                                   | 91.6                                                                                     | 90.4                                                                                     | 88.7                                                                                     |
| <b>Psychological health</b>                                                                                     |                                                                                        |                                                                                          |                                                                                          |                                                                                          |
| Daily activity limitation**  | 5.0                                                                                    | 2.8                                                                                      | 5.1                                                                                      | 3.8                                                                                      |
| Depression                   | 3.0                                                                                    | 2.8                                                                                      | 1.2                                                                                      | 9.2                                                                                      |
| Suicide ideation             | 4.7                                                                                    | 3.0                                                                                      | 5.4                                                                                      | 10.7                                                                                     |
